# Supplementary material for: Understanding the significance of O-doped graphene towards biomedical applications
Source: Royal Society of Chemistry journal article supplement (doi:10.1039/c6ra23416j), 2016-01-01
Supplement: c6ra23416j1.pdf [file c6ra23416j1.pdf]

## Supplementary Information

### Understanding the Significance of O-doped Graphene towards Biomedical Applications

Shrikant S Maktedar <sup>a</sup>, Gopal Avashthi <sup>a</sup>, Man Singh <sup>\*a</sup>

<sup>a</sup> School of Chemical Sciences, Central University of Gujarat, Gandhinagar-382030, India

\* Corresponding author: Tel: +91-079-23260210; Fax: +91-079-23260076

E-mail address: [\\*mansingh50@hotmail.com](mailto:mansingh50@hotmail.com) (\*Man Singh), [shrikantmaktedar@gmail.com](mailto:shrikantmaktedar@gmail.com),

[gopalavashthi@gmail.com](mailto:gopalavashthi@gmail.com)

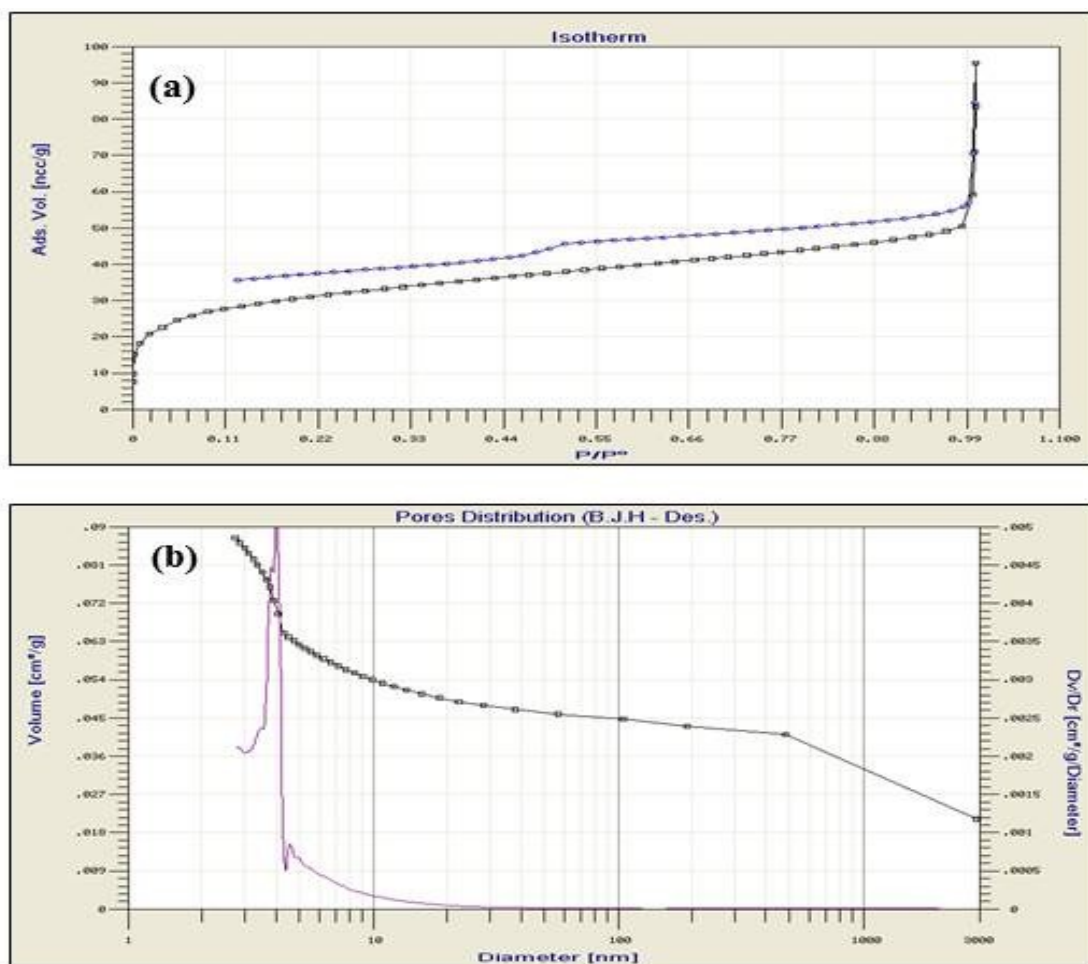

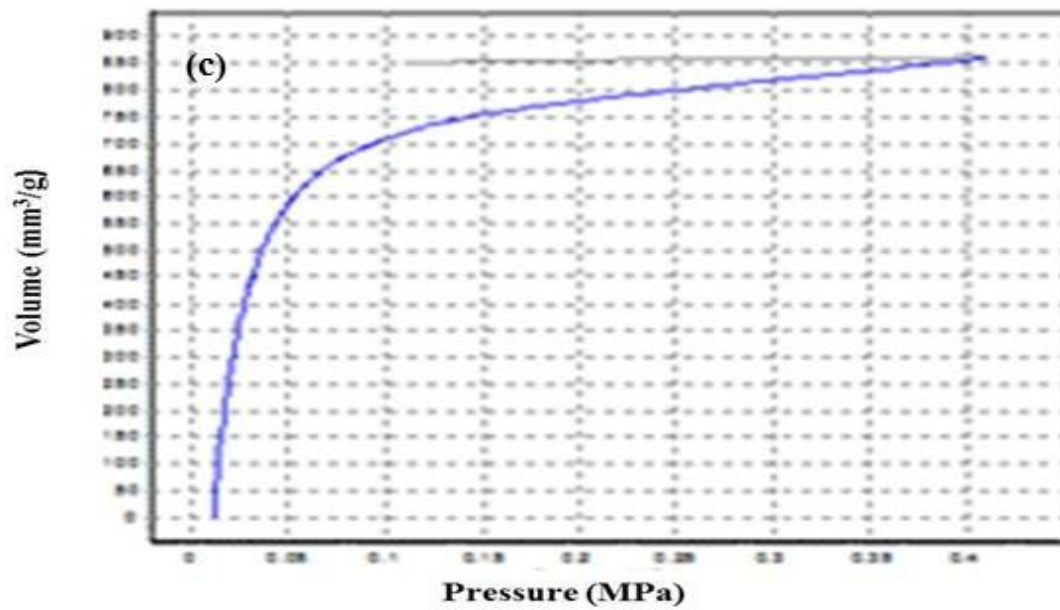

Fig. S1: BET and Porosimeter analysis of graphene oxide (a) Nitrogen adsorption isotherm (b) Pore size distribution (c) Pore morphology
